1 **Friction is preferred over grasp configuration in precision grip grasping**

2

3 **Authors:**

4 Lina K. Klein<sup>1</sup> (ORCID: 0000-0002-0892-7228)

5 Guido Maiello<sup>1,\*</sup> (ORCID: 0000-0001-6625-2583)

6 Roland W. Fleming<sup>1,2</sup> (ORCID: 0000-0001-5033-5069)

7 Dimitris Voudouris<sup>1</sup> (ORCID: 0000-0001-9110-0928)

8

9 **Affiliation:**

10 <sup>1</sup>Justus Liebig University Giessen, Giessen, Germany

11 <sup>2</sup>Center for Mind, Brain and Behavior (CMBB), Philipps-Universität Marburg and Justus  
12 Liebig University Giessen, Marburg, Germany

13

14 **Running Head:**

15 Friction over grasp configuration in precision grip grasping

16

17 **Address for Correspondence:**

18 \* Guido Maiello

19 tel. +49 (0)641 99 26232 / email: [guido\\_maiello@yahoo.it](mailto:guido_maiello@yahoo.it)

20 Justus-Liebig-Universität Giessen,

21 Abteilung Allgemeine Psychologie,

22 Otto-Behaghel-Strasse 10F,

23 35394 Giessen, Germany

24 **ABSTRACT**

25 How humans visually select where to grasp an object depends on many factors, including grasp  
26 stability and preferred grasp configuration. We examined how endpoints are selected when  
27 these two factors are brought into conflict: Do people favor stable grasps or do they prefer their  
28 natural grasp configurations? Participants reached to grasp one of three cuboids oriented so that  
29 its two corners were either aligned with, or rotated away from, each individual's natural grasp  
30 axis (NGA). All objects were made of brass (mass: 420 g) but the surfaces of their sides were  
31 manipulated to alter friction: 1) all-brass, 2) two opposing sides covered with wood, while the  
32 other two remained of brass, or 3) two opposing sides covered with sandpaper, and the two  
33 remaining brass sides smeared with vaseline. Grasps were evaluated as either clockwise (thumb  
34 to the left of finger in frontal plane) or counterclockwise of the NGA. Grasp endpoints depended  
35 on both object orientation and surface material. For the all-brass object, grasps were bimodally  
36 distributed in the NGA-aligned condition but predominantly clockwise in the NGA-unaligned  
37 condition. These data reflected participants' natural grasp configuration independently of  
38 surface material. When grasping objects with different surface materials, endpoint selection  
39 changed: Participants sacrificed their usual grasp configuration to choose the more stable object  
40 sides. A model in which surface material shifts participants' preferred grip angle proportionally  
41 to the perceived friction of the surfaces accounts for our results. Our findings demonstrate that  
42 a stable grasp is more important than a biomechanically comfortable grasp configuration.

43

44

45 **NEW & NOTEWORTHY:** When grasping an object, humans can place their fingers at several  
46 positions on its surface. The selection of these endpoints depends on many factors, with two of  
47 the most important being grasp stability and grasp configuration. We put these two factors in  
48 conflict and examine which is considered more important. Our results highlight that humans are  
49 not reluctant to adopt unusual grasp configurations in order to satisfy grasp stability.

50

51 **KEYWORDS:** Grasping | Precision grip | Surface Material | Grasp Angle

## 52 INTRODUCTION

53 When grasping, humans must select appropriate contact points with the object out of a plethora  
54 of possible options. This choice is nontrivial and depends on several characteristics of the object,  
55 such as its position in relation to the actor (Paulignan et al., 1997; Briere & Proteau, 2011),  
56 orientation (Voudouris, Smeets, Brenner, 2013; Paulun et al., 2016), size (Hesse & Franz, 2009;  
57 van de Kamp et al., 2009), center of mass (Lukos et al., 2007; Voudouris et al., 2019), surface  
58 material (Fikes et al., 1994; Wing & Lederman, 2009), and visibility (Paulun et al., 2016; Maiello,  
59 Paulun et al., 2019). We have recently shown computationally that grasp endpoint selection is  
60 determined by an intersection of constraints derived from these factors (Klein, Maiello et al.,  
61 2020; Maiello, Schepko et al. 2021). Two critical underlying factors for endpoint selection are the  
62 prioritization of a stable grasp and the adoption of the natural grasp configuration.

63 Stable grasps are ensured by applying forces within the cone of friction, so humans bring  
64 their digits orthogonally to the object's surface (Kleinholdermann et al., 2007). When grasping  
65 low-friction objects, humans reduce endpoint variability (Paulun et al., 2016) and tailor each  
66 digit's grip forces to the local surface properties (Burstedt et al., 1999), suggesting more careful  
67 endpoint selection when anticipating unstable grasps. Unsurprisingly, when grasping elongated  
68 objects of combined smooth and rough surfaces, humans choose endpoints on the rough  
69 surfaces, presumably to foster grasp stability. Interestingly, though, endpoints are chosen on  
70 smooth surfaces if doing so minimizes the torques associated with subsequent object  
71 manipulation (Wing & Lederman, 2009; Glowania et al., 2017), suggesting that, although grasp  
72 stability is important, other energetic factors are also considered when choosing endpoints.

73 Grasp control attempts to optimize energy expenditures (Soechting et al., 1995) and  
74 minimize travel and spatial error costs (Rosenbaum et al., 2001). A key aspect for selecting the  
75 grasp configuration is that extreme joint angles should be avoided (Rosenbaum et al., 2001)  
76 because such configurations increase spatial errors (Rosseti et al., 1994). To this end, humans  
77 keep their final grasp configurations approximately invariant (Rosenbaum et al., 1992; Grea et  
78 al., 2000; Voudouris, Radhakrishan et al., 2013), even when obstacles hinder these configurations  
79 (Voudouris et al., 2012a). When grasping cuboid objects that can be grasped with only two  
80 configurations, one of which requires the digits to be placed on object positions that are

81 occluded, humans still prioritize their natural grasp configuration by tolerating invisible endpoints  
82 (Voudouris et al., 2012b). These examples further highlight the importance of grasp configuration  
83 in the selection of endpoints.

84         Considering the critical role that both grasp stability and final grasp configuration have in  
85 grasp endpoint selection, an emerging question relates to the trade-off between these two  
86 factors. If grasp stability is prioritized, humans should choose endpoints that provide stable  
87 grasps, even when this requires unusual grasp configurations. Alternatively, if final grasp  
88 configuration is prioritized, humans should keep their natural grasp posture invariant, even if this  
89 would lead to unstable endpoints. To examine this, we asked participants to reach, grasp, and lift  
90 cuboid objects of different surface materials. By using cuboids, participants could choose  
91 endpoints on only one of the two pairs of opposing surfaces, requiring grasp configurations  
92 orthogonal to each other. By manipulating the friction properties of each pair of surfaces, we  
93 disentangled the contributions of grasp stability and grasp configuration by examining whether  
94 humans prioritize their usual grasp configuration, even if this would sacrifice grasp stability, or  
95 whether they prioritize grasp stability by adopting awkward final grasp postures.

## 96 MATERIALS AND METHODS

97

### 98 Participants

99 Twenty-one naïve self-reported right-handed participants (mean age: 24.4 years, 16 females)  
100 with normal or corrected-to-normal vision participated in our study. This sample size was  
101 selected though a-priori power analysis, based on a pilot experiment (N=7), to guarantee that we  
102 could detect the smallest effect of interest at the 95% confidence level with 80% power. All  
103 procedures were approved by the local ethics board and adhered to the declaration of Helsinki  
104 (2013). All participants provided written informed consent prior to the experiment and received  
105 monetary compensation for their efforts.

106

### 107 Apparatus

108 A schematic depiction of the setup is shown in **Figure 1a**. Participants sat at a table with their  
109 right hand at a start position aligned to their shoulder, 9 cm from the table's edge. Objects were  
110 placed in front of the participants at a target position aligned with their midline, 16 cm from the  
111 table's edge. Movements of the participants' right thumb and index fingers were recorded at 100  
112 Hz with an Optotrak Certus (Northern Digital Inc., Waterloo, ON, Canada) that tracked the  
113 position of small infrared markers attached to the respective fingernails (with sub-millimeter  
114 accuracy and resolution). A monitor was placed on the table in front of the experimenter, who  
115 sat next to the participants. The monitor displayed to the experimenter which condition to set  
116 up on each trial. The experiment was programmed in Matlab R2019b using the Motom Toolbox  
117 (Derzsi & Volcic, 2018).

118 The target objects and the experimental conditions are shown in **Figure 1b**. In the main  
119 experiment, the object was one of three possible cuboids (5 cm x 5 cm x 2 cm) that was oriented  
120 either with its corners aligned to the participant's individual NGA or rotated 22.5°  
121 counterclockwise. All objects were made of brass (mass: 420 g) but the surface material of the  
122 sides was manipulated, so that the sides were either all-brass (*baseline object*), or two of the  
123 opposing sides were covered with wood and the other two remained with brass (*wooden object*),  
124 or two of the opposing sides were covered with sandpaper and the other two brass sides were

125 made slippery using Vaseline (“*brasseline*” object). Each of the wooden and *brasseline* objects  
 126 could be placed in two configurations, such that their higher- and lower-friction sides were  
 127 alternated clockwise and counterclockwise.  
 128

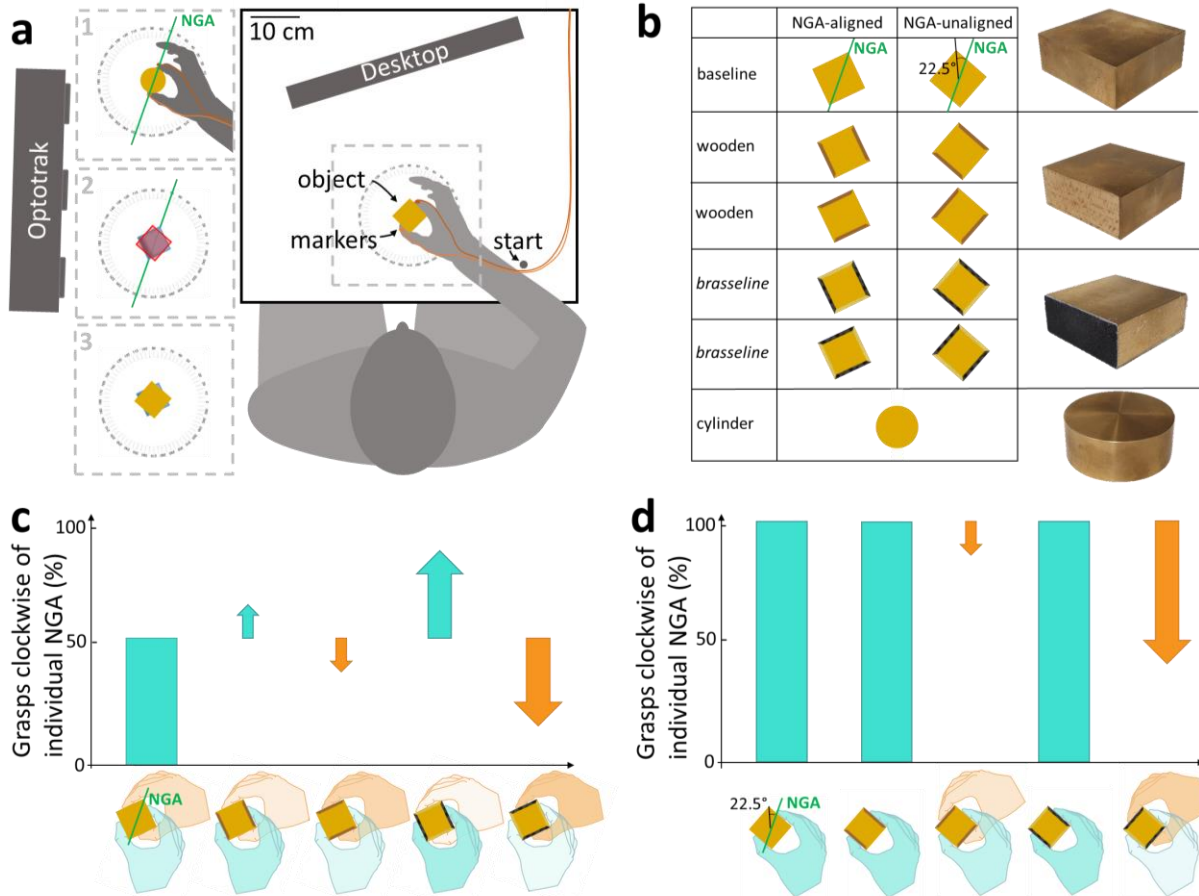

129  
 130 **Figure 1: Experimental setup and predictions.** **a** Participants reached to grasp and lift an object placed in  
 131 front of them. After lifting it, they put the object back down, before returning to the start position. **1** They  
 132 first grasped a cylinder 10 consecutive times to determine each individual’s NGA. **2** The experimenter  
 133 aligned the object outline template with the NGA. **3** The target cuboid object was aligned with a protractor  
 134 template according to the condition angle and orientation. **b** Each cuboid was presented at two  
 135 orientations: with its corners either aligned with the NGA or rotated 22.5° counterclockwise. The wooden  
 136 and *brasseline* objects were presented also in two configurations, so that their higher- and lower-friction  
 137 sides were alternated clockwise and counterclockwise. The cylinder was only used to determine the NGA  
 138 before the trials involving the cuboids. Object pictures are presented next to the corresponding conditions.  
 139 **c,d** Predictions regarding the percentage of clockwise grasps for different surface material configurations,  
 140 for **c** NGA-aligned and **d** NGA-unaligned conditions. Arrows visualize a change in behavior compared to  
 141 the baseline prediction. A thin downwards pointing arrow predicts a small decrease in clockwise grasps, a  
 142 large arrow a larger decrease. The hands’ degree of translucency represents the amount of predicted  
 143 clockwise (cyan hand) vs. counterclockwise (orange hand) grasps.

144

145

146 **Procedure**

147 Before each trial, participants placed their thumb and index finger at the start position and the  
148 experimenter placed the object at the target position at the appropriate orientation and  
149 configuration. The experimenter could very precisely position each object at the correct angle by  
150 aligning the edges with the corresponding outlines on a protractor template on the table. An  
151 auditory cue prompted participants to reach and grasp the object using only their thumb and  
152 index finger, and then lift it ~10 cm high while keeping it level. Participants had to place the object  
153 back down at roughly the same position before returning to the start position in anticipation of  
154 the next trial. Participants were to execute the task in 3 seconds and could see the object at all  
155 times during the experiment. No other instructions were given.

156 Prior to the main experiment, to measure each individual's NGA, participants performed  
157 10 grasps to a brass cylinder (diameter 5 cm, height 2 cm, weight 332 g). From these 10 trials, an  
158 individual's NGA was calculated as the median orientation of the grip at the moment of grasp.  
159 The experimenter then marked two orientations on the protractor template around the target  
160 position so that one corresponded to the calculated NGA (NGA-aligned) and another was rotated  
161 22.5° counterclockwise (NGA-unaligned). Using these outlines, participants performed 6 practice  
162 trials drawn from a subset of the experimental conditions, during which they were familiarized  
163 with the task and cuboid objects.

164 The main experiment then started, in which participants grasped only the cuboids. Each  
165 of the 10 conditions (**Figure 1b**) was presented 10 times (100 trials per participant), across three  
166 object-specific sub-blocks to minimize trial-order effects (Maiello et al, 2018): presentation of  
167 baseline, wooden, and the *brasseline* objects were shuffled across participants in a Latin square  
168 design. Within each sub-block, object orientation and configuration were presented in  
169 pseudorandomized order.

170 Immediately after the grasping experiment, we asked participants to judge the  
171 slipperiness and pleasantness to the touch of each of the four surfaces they could grasp during  
172 the experiment. On the monitor participants viewed pictures of the objects with one of the four  
173 possible materials facing the participants. Using the mouse in eight separate trials, they first set

174 a slider on a scale from slippery to not slippery and afterwards rated the same four surfaces from  
175 pleasant to not pleasant.

## 176 **Analyses**

177 **Endpoints.** Endpoints of both fingers with the objects were determined as the coordinates of the  
178 markers on the fingernails at the time of contact, as this was determined using the method  
179 developed by Schot et al. 2010 and previously described in Paulun et al. (2016). In detail, the  
180 average position of the two markers on the fingernails, which represented the position of the  
181 hand, had to travel more than half the distance between the start and the target position, and  
182 the likelihood of a sample being the moment of contact increased with lower vertical positions  
183 and with lower speeds of the hand.

184 **Grip Angle.** We were interested in which pair of opposing sides was grasped at the moment of  
185 object contact in relation to the objects' surface material. Therefore, for each trial we first  
186 computed the final grip angle along the horizontal plane as:  $\eta = \text{atan2}(y_{index} - y_{thumb}, x_{index} -$   
187  $x_{thumb})$ . Then, we classified each grip as either clockwise, if the grip angle was  $\eta < NGA$  (thumb  
188 to the left of finger in frontal plane), or counterclockwise, if  $\eta \geq NGA$ . Finally, we computed the  
189 percentage of clockwise grasps for each participant in each condition.

190 **Predictions.** Our a-priori, qualitative predictions are illustrated in **Figure 1(c,d)**. For the NGA-  
191 aligned orientation there is no obvious preferred grasp configuration for the baseline object  
192 (Voudouris et al., 2012b), so participant grasps, at least in the group level, should be split equally  
193 between clockwise and counterclockwise. For wooden and *brasseline* objects, we predict more  
194 grasps on the wooden and sandpaper sides, respectively, as these surfaces have higher friction  
195 and facilitate more stable grasps. For the NGA-unaligned conditions, one pair of sides requires  
196 counterclockwise rotations away from the NGA that are twice as large as those required for the  
197 clockwise pair of sides (Voudouris et al., 2012b). Therefore, in these conditions we can directly  
198 contrast grasp configuration with grasp stability. If the former is more important, participant  
199 grasps should be predominantly clockwise, independently of the surface material. If, instead,  
200 grasp stability is prioritized, we predict lower proportions of clockwise grasps when the higher  
201 friction cube sides are oriented counterclockwise.



202 **Statistical analyses: a priori, hypothesis-driven analyses.** To assess whether our experimental  
203 manipulations shifted participants' grasps clockwise or counterclockwise, we analyzed the  
204 percentage of clockwise grasps using a repeated-measures generalized linear mixed effects  
205 model (GLMM) with fixed effects for object orientation, surface configuration, and the  
206 interaction between these, plus random subject-level effects. We defined a logit link function  
207 and the conditional distribution of the responses as a Binomial distribution. This is conceptually  
208 similar to repeated measures analysis of variance, but overcomes ANOVA shortcomings with  
209 percentage data (Jaeger, 2008). Comparisons between condition pairs were performed via two-  
210 tailed, paired samples t-tests after variance-stabilizing the percentage data via arcsine square  
211 root transformation. We report effect size for differences between condition means on variance-  
212 stabilized data as  $d = \mu_{c1-c2} / \sigma_{c1-c2}$ . Statistical significance was set at  $\alpha < 0.05$ . All analyses  
213 were performed in Matlab version R2019b.

214 **RESULTS**

215 We investigated grasp endpoint selection when trading-off between grasp configuration and  
216 grasp stability. Participants grasped and lifted a cuboid while we varied the surface material of  
217 each pair of its sides. This introduced conditions in which higher friction surfaces were orthogonal  
218 to the usual grasp configuration, and thereby we could quantify the contribution of each of these  
219 factors in endpoint selection.

220 **Figure 2a** displays each participant's ten grip orientations and the associated median (the  
221 NGA estimate) when grasping the brass cylinder. Across participants, the mean  $\pm$  standard  
222 deviation NGA was  $66^\circ \pm 9^\circ$ . **Figure 2b,c** presents an overview of the distributions of the grip  
223 angles (relative to each individual's NGA) for each condition involving the cuboid. For objects  
224 aligned with the NGA (**Figure 2b**), baseline grips (top row) were bimodally distributed across  
225 participants. This bimodal distribution was somewhat skewed when grasping the low-constraint  
226 wooden object (rows 2,3), and became clearly unimodal when grasping the *brasseline* object  
227 (rows 4,5). For objects rotated  $22.5^\circ$  away from the NGA (**Figure 2c**), baseline grips were  
228 predominantly clockwise, and remained so when the higher friction surfaces were aligned with  
229 this natural grasp configuration (rows 2 and 4). Interestingly, when the higher friction surfaces  
230 were orthogonal to the baseline grip axis, participants switched their grasp configuration to  
231 choose more stable endpoints, subtly for the wooden object (row 3) but massively for the  
232 *brasseline* object (row 5).

233

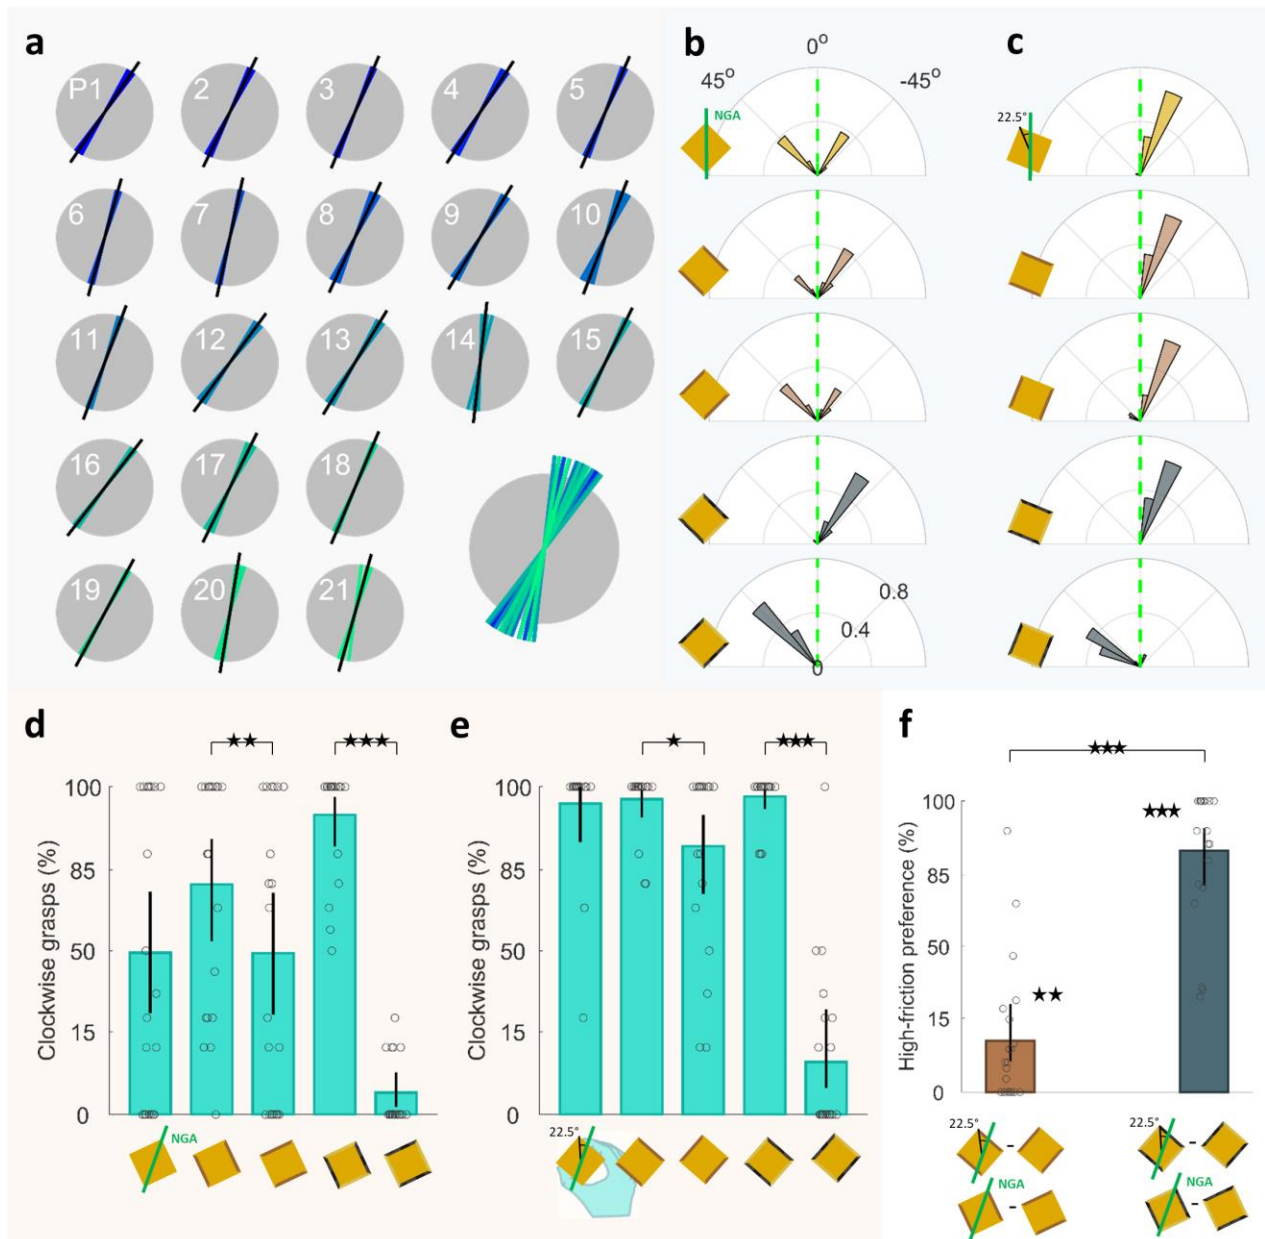

234

235 **Figure 2: Shifts in grasp orientation following object orientation and surface material. a** NGA estimation:

236 grip orientation of all ten trials (colored lines) and median grip angles (black lines) for each participant

237 (separate panels) when grasping the brass cylinder. All median NGA estimates are depicted in the lower

238 right panel. **b,c** The proportion of grip angles, relative to each individual's NGA, for all material

239 configurations. **b** Cube corners aligned with the NGA. **c** Cube corners rotated 22.5° away from the NGA.

240 **d,e** The percentage of clockwise grip angles for each of the five conditions when cuboid corners were **d**

241 aligned with the NGA and **e** when not. **f** Difference in %clockwise grasps between surface configurations for

242 the wooden and brassline objects, collapsed across object orientations. In panels **d,e,f**, circles denote

243 individual participants, bars are means across participants, error bars are 95% bootstrapped confidence

244 intervals. Y-axes are scaled following the arcsine square root transform. \* $p < .05$ ; \*\* $p < .01$ ; \*\*\* $p < .001$ .

245           These results were further confirmed by our statistical analyses. GLMM analysis on the  
246 percentage of clockwise grasps (**Figure 2d,e**) showed a significant main effect of object  
247 orientation ( $p < .001$ ), as participants grasped the NGA-aligned objects with a bimodal distribution  
248 of grip angles, but the NGA-unaligned objects primarily with clockwise grips, in line with previous  
249 findings (Voudouris et al., 2012b). The percentage of clockwise grips was further affected by the  
250 surface material configuration ( $p < .001$ ), and this effect was different depending on the object's  
251 orientation (interaction;  $p < .001$ ). Specifically, for the *brasseline* object, grips were more often  
252 clockwise and counterclockwise following the higher friction material in both the NGA-aligned  
253 ( $t(20)=17.9$ ,  $p < .001$ ,  $d=3.9$ ) and unaligned orientations ( $t(20)=13$ ,  $p < .001$ ,  $d=2.8$ ). This pattern was  
254 observed also for the wooden object, but was weaker (NGA-aligned:  $t(20)=3.4$ ,  $p=.0031$ ,  $d=0.73$ ;  
255 NGA-unaligned:  $t(20)=2.8$ ,  $p=.011$ ,  $d=0.61$ ). Note that this interaction arose because in the NGA-  
256 aligned orientation, grips shifted both clockwise and counterclockwise from baseline, whereas in  
257 the NGA-unaligned orientation they only shifted counterclockwise.

258           **Figure 2f** further shows the effect of surface material assessed independently of object  
259 orientation. Specifically, for each object orientation we calculated the difference in clockwise  
260 grasps between the two configurations of each (wooden and *brasseline*) object, and then  
261 calculated the average difference across the two object orientations, with greater values  
262 indicating stronger preference for higher friction surfaces. We found that grasps were  
263 significantly attracted toward the higher friction sides both for the wooden ( $t(20)=3.4$ ,  $p=.003$ ,  
264  $d=0.74$ ) and the *brasseline* objects ( $t(20)=16.5$ ,  $p < .001$ ,  $d=3.6$ ), but that the strength of this  
265 attraction was greater in the *brasseline* than the wooden object ( $t(20)=10.4$ ,  $p < .001$ ,  $d=2.3$ ).

266           Participants performed repeated trials for each condition. We thus wondered whether  
267 the observed shifts in grasp orientation were based on visual estimation of object properties or  
268 on the memory from repeated experience with the object. To answer this question, we repeated  
269 our analyses using only the first trial from each participant in each condition, and found that our  
270 findings remained unvaried (correlation between full and reduced dataset:  $r = 0.99$ ,  $p < .001$ ).

271           In short, participants grasped the higher friction surfaces more often than the lower  
272 friction surfaces. This was clearly evident when the higher friction surfaces were orthogonal to  
273 the baseline grip axis, and particularly apparent in the NGA-unaligned orientation conditions,

274 when grasp stability and final grasp configuration were fully contrasted. Indeed, when grasping  
275 the NGA-unaligned *brasseline* object, participants used grasp configurations that were almost  
276 never used when grasping the NGA-unaligned baseline object (compare first and last rows of  
277 **Figure 2c**). It is possible that participants were content to select these unusual grasp  
278 configurations because they could readjust their grip and arm posture when lifting the object off  
279 the table. We thus compared grip angles at moment of first contact with grip angles 500 ms after  
280 contact, i.e., during object lift. Even when adopting the postures farthest from the NGA (last row  
281 of **Figure 2c**), participants readjusted their grip posture on average only by  $1 \pm 4^\circ$ , suggesting they  
282 maintained postures away from the NGA throughout the grasping action. Therefore, humans  
283 prefer endpoints that facilitate stable grasps, even when this requires unusual grasp  
284 configurations.

285

### 286 **A simple model: surface friction shifts participants' preferred grip angle**

287 To gain further insights into the process by which grasp stability and grasp configuration interact  
288 when choosing endpoints, we devised a simple model to explain our pattern of results (**Figure 3**).  
289 First, we assumed that an individual participant will exhibit a preferred grip axis that follows a  
290 normal distribution  $N(\mu, \sigma)$ , with mean  $\mu_{NGA}$  and standard deviation  $\sigma_{NGA}$ . In the equal material  
291 conditions (**Figure 3a**), a participant's grasps will be clockwise or counterclockwise depending on  
292 whether this participant's NGA is clockwise or counterclockwise of the cube's diagonal, here  
293 named  $\xi$ . Thus, in the NGA-aligned condition (**Figure 3a**, top), where we aligned the cube's  
294 diagonal with each participant's estimated NGA, approximately 50% of grasps should be oriented  
295 clockwise (green shaded region of the distribution) and 50% of grasps should be  
296 counterclockwise (orange region). In the NGA-unaligned condition (**Figure 3a**, middle), where the  
297 cube diagonal is rotated away from each participant's measured NGA, most of the NGA  
298 distribution should fall clockwise to this diagonal, thus most grasps should be clockwise. The  
299 proportion of clockwise grasps  $P_{cw}$  can thus be formalized as the value of the cumulative normal  
300 function  $\Phi(x, \mu_{NGA}, \sigma_{NGA})$ , evaluated at  $x = \xi$ :

301

$$P_{cw} = \Phi(\xi, \mu_{NGA}, \sigma_{NGA})$$

302

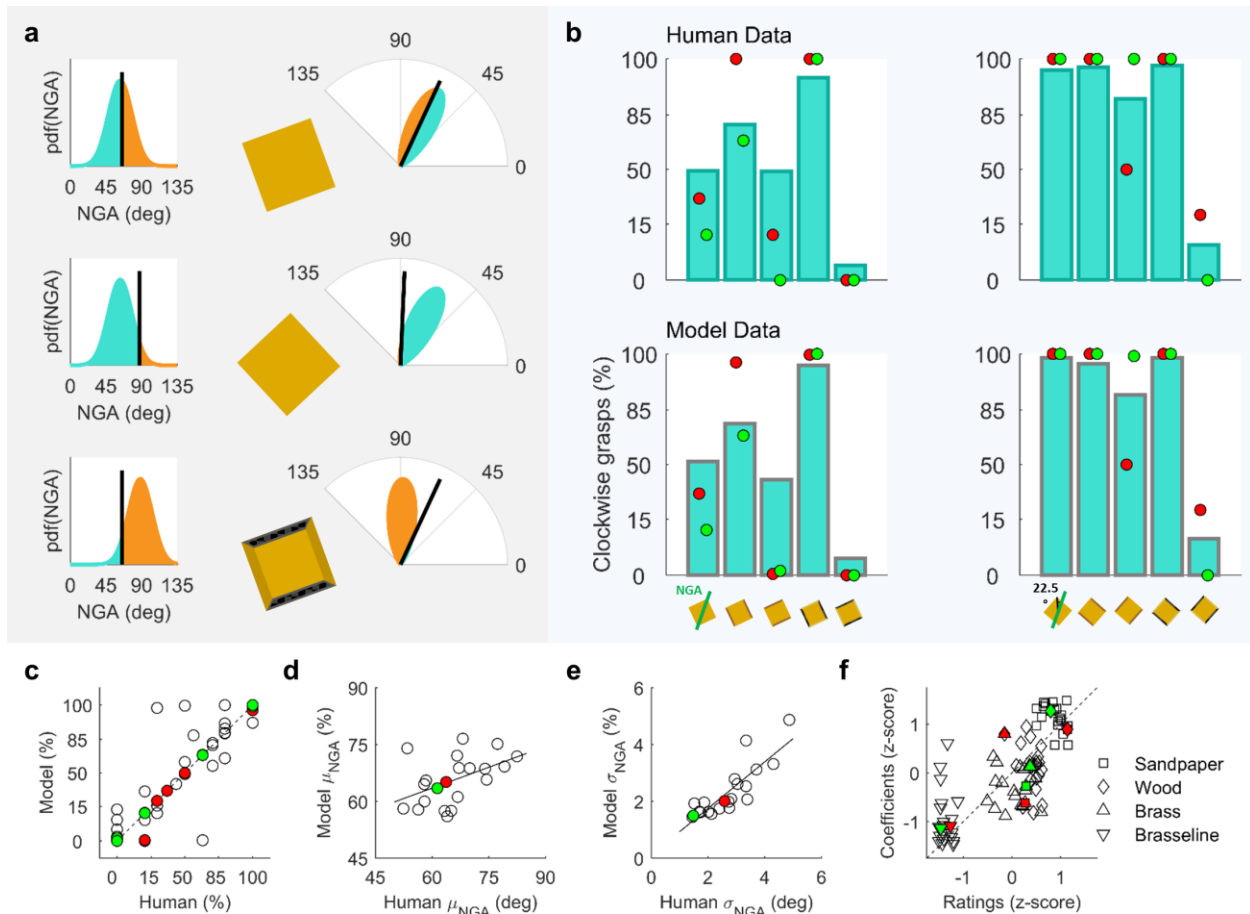

303

304 **Figure 3. Model results.** **a** Model behavior, exemplified at the group level. In the same material conditions  
 305 (top and middle), the cube diagonals (black lines) in the aligned and unaligned conditions split the NGA  
 306 distribution into clockwise (green) and counterclockwise (orange) grips by different amounts. For clarity,  
 307 here we show the NGA distribution in both Cartesian (left) and polar axes (right). In one example condition  
 308 with different surface materials, the NGA distribution is shifted counterclockwise following the surface  
 309 with higher friction (sandpaper/black). **b** These shifts very closely capture the patterns of human data,  
 310 both at the group level, and at the level of individual participants (two example participants are shown as  
 311 green and red dots). **c** Human vs Fitted model percent clockwise grasps. **d,e** Human vs Fitted model  $\mu_{NGA}$   
 312 and  $\sigma_{NGA}$ . **f** Human ratings of perceived surface friction vs Fitted model friction coefficients.  
 313

314 In conditions with different materials at the opposing pairs of surfaces (**Figure 3a**,  
 315 bottom), we assumed that each individual's  $\mu_{NGA}$  shifts clockwise and counterclockwise by  
 316 amounts proportional to the perceived friction of the surfaces  $v_{material}$  and to the clockwise or  
 317 counterclockwise rotations required to grasp these surfaces,  $\varphi_{\theta,cw}$  and  $\varphi_{\theta,ccw}$ , with:

$$318 \quad \varphi_{0,cw} = -45; \varphi_{0,ccw} = +45; \varphi_{\pi/8,cw} = -22.5; \varphi_{\pi/8,ccw} = +67.5$$

319

320 Specifically:

$$321 \quad \mu_{\theta, \text{material-cw/material-ccw}} = \mu_{NGA} + v_{\text{material-cw}} \times \varphi_{\theta, cw} + v_{\text{material-ccw}} \times \varphi_{\theta, ccw}$$

322 The unknown variables in this framework are thus the positive valued, perceived friction  
323 coefficients:

$$324 \quad v_{\text{wood}}, v_{\text{brass}}, v_{\text{sandpaper}}, v_{\text{brasseline}}$$

325

326 Note that we measured each participant's NGA prior to our main experiment, and we  
327 could thus estimate  $\mu_{NGA}, \sigma_{NGA}$  from these measurements. However, as validation of our model,  
328 we also seeded the model with the NGA measurements, but allowed  $\mu_{NGA}, \sigma_{NGA}$  as free  
329 parameters. We fit this simple model to each individual participant's data, and found that the  
330 model is able to closely replicate the observed patterns of human data both at the group level  
331 (**Figure 3c**) and at the level of individual participants (**Figure 3d**), even after adjusting for the  
332 number of predictors in the model ( $r=0.98, p<.001, r^2=0.96, r^2_{\text{adjusted}}=0.90$ ). Figures 3d and 3e  
333 show that the model's fitted  $\mu_{NGA}$  and  $\sigma_{NGA}$  parameters both significantly correlate with the  
334 NGA measurements taken with the brass cylinder object prior to the main experiment ( $r=0.48,$   
335  $p=.027$  and  $r=0.85, p<.001$ , respectively). **Figure 3f** further shows that the fitted friction  
336 coefficients also significantly correlate with human perceptual ratings of friction ( $r=0.75, p<.001$ ).

337 Note that the human perceptual ratings of friction also correlated with the ratings of  
338 pleasantness ( $r=0.80, p<.001$ ), and thus pleasantness ratings also correlated with model friction  
339 coefficients ( $r=0.58, p<.001$ ). However, human perceptual ratings of friction explain 20% more of  
340 the variance in the fitted model coefficients.

341 Given the correlations between model and human NGA parameters, it is also possible to  
342 construct a model with only the friction coefficients as free parameters, fixing  $\mu_{NGA}$  and  $\sigma_{NGA}$  to  
343 the experimentally measured values for each participant. This reduced model is also able to  
344 replicate the observed patterns of human data ( $r=0.84, p<.001, r^2=0.71, r^2_{\text{adjusted}}=0.51$ ), and the  
345 fitted friction coefficients again significantly correlate with human perceptual ratings of friction  
346 ( $r=0.65, p<.001$ ) better than with pleasantness ratings ( $r=0.45, p<.001$ ). This simple model is thus  
347 able to directly relate human perception of surface friction to the selected hand posture for  
348 grasping.



## 349 **DISCUSSION**

350 We examined whether the selection of grasp endpoints depends primarily on the grasp stability  
351 or on the adoption of the usual grasp configuration at the moment of the grasp. To this end, we  
352 first measured individual NGAs and then oriented cuboid objects so that their corners were either  
353 aligned with the individual NGA or rotated 22.5° counterclockwise from the NGA. By having  
354 participants grasp cuboids, we implicitly asked them to grasp the cuboid object with one of two  
355 possible grasp configurations. By placing these cuboids at two different orientations, we created  
356 conditions in which grasps could be either bimodally distributed or systematically directed to one  
357 pair of the object's sides. By further manipulating the materials of the object's surfaces, we  
358 introduced conditions in which the axis connecting the higher friction surfaces was orthogonal to  
359 the grasp axis required for adopting the usual final grasp configuration, eventually allowing us to  
360 test which of the two factors is more important for contact point selection. Our results are clear:  
361 Humans choose endpoints that promote stable grasps, even if this requires adopting unusual  
362 grasp configurations.

363         The object's orientation influenced the selection of endpoints as expected (Voudouris et  
364 al., 2012b). When grasping the NGA-aligned all-brass object, grasp orientations at the population  
365 level were bimodally distributed, reflecting that objects could indeed be grasped from both pairs  
366 of sides without adopting awkward grasp configurations. Interestingly however, single  
367 participant grasps were less bimodally-distributed than at the group level, even when  
368 participants should not have had a clear preference in grip orientation, perhaps reflecting the  
369 fact that grasp planning, such as grip forces and digit placement, is sensitive to sensorimotor  
370 memories obtained in previous trials (Lukos et al., 2013; Witney et al., 2000). When grasping the  
371 NGA-unaligned all-brass object, the grasp distribution was clearly unimodal, suggesting that  
372 participants systematically chose grasp configurations within the midrange of their joints and  
373 avoided extreme joint angles at the moment of the grasp (Rosenbaum et al., 2001), likely to avoid  
374 pronounced endpoint errors (Rosseti et al., 1994).

375         Our main interest, though, was whether participants would sacrifice their usual grasp  
376 configuration to choose stable endpoints or whether they would tolerate endpoints on the lower  
377 friction surfaces to maintain their usual grasp configuration. We show that participants were



378 content to adopt unusual grasp configurations that foster grasp stability. This is reflected in the  
379 systematic switches of grasps between the two different configurations of each (wooden and  
380 *brasseline*) object, and is highlighted in the clear change of behavior when grasping the different  
381 configurations of the *brasseline* object: Participants tailored their grasp configurations to ensure  
382 that their digits landed almost always on the sandpaper rather than on the vaseline-covered  
383 surface (see **Figure 2d,e**). This behavior was also evident for the wooden object, but less  
384 pronounced. A possible reason for this difference might be that participants avoided the vaseline-  
385 covered surface for other reasons than slipperiness per se, for instance to avoid having vaseline  
386 stuck on their digits or due to the unpleasantness of that material. We believe that this is unlikely,  
387 as our modelling demonstrates that participant grasps are more directly related to perceived  
388 surface friction, rather than perceived pleasantness to the touch. Rather, the difference between  
389 the wooden and the *brasseline* objects should be attributed to the lower relative costs of grasping  
390 the two surfaces of the wooden object (brass over wooden) compared to the greater costs of  
391 grasping the two surfaces of the *brasseline* object (vaseline-covered brass over sandpaper). Of  
392 course, if grasping the higher friction surfaces required particularly extreme grasp configurations  
393 (e.g., at the very limits of what is biomechanically possible), participants may have favored the  
394 lower friction of the two alternative grasps, as long as they could produce sufficient forces to  
395 overcome the lack of friction. However, we find that within the range of conditions tested,  
396 participants spontaneously adopted grasp configurations that they otherwise would almost  
397 never produce to avoid the difficulties associated with grasping a slippery surface.

398 Our model linking perceptual ratings of friction to final grip orientation hints at how a  
399 simple neural circuit could implement these changes in grip selection in the brain, for example  
400 within the network formed between the Ventral Premotor Cortex (Area F5), Dorsal Premotor  
401 Cortex (Area F2), and the Anterior Intraparietal Sulcus (AIP). Areas F5 and F2 encode grip-wrist  
402 configuration and orientation (Raos et al, 2004; Raos et al, 2006). Both regions exhibit strong  
403 connections with AIP (Murata et al, 2000), which in turn plays a key role in linking the ventral  
404 visual stream (where visual material properties are encoded) to the hand motor system (Borra et  
405 al, 2008). Therefore, through area AIP, estimates of surface friction coming from ventral visual  
406 areas could bias our preferred grip orientation encoded in areas F5 and F2.

407           Choosing grasp endpoints requires the consideration of several factors. Two main factors  
408 are grasp stability and the final grasp configuration (Klein, Maiello et al., 2020). Grasp stability is  
409 important when controlling grasping and choosing endpoints (Paulun et al., 2016; Smeets &  
410 Brenner, 1999). Interestingly, humans have been found to sacrifice grasp stability in order to  
411 adopt grasp configurations that minimize other energy-related costs, such as torques during  
412 object manipulation (Glowania et al., 2017). Yet the magnitude of grip force that is required to  
413 overcome surface friction also determines energy expenditure and thus places additional  
414 constraints on grasp point selection, suggesting a crucial role of surface material properties in  
415 grasping. By directly juxtaposing the contributions of grasp configuration and stability, we  
416 demonstrate that participants systematically chose endpoints that promote stable grasps, even  
417 when these endpoints required grasp configurations that would otherwise be avoided. We  
418 conclude that humans strive for stable grasp endpoints at the expense of their final grasping  
419 posture.

420 **ACKNOWLEDGMENTS**

421 This research was supported by the DFG (IRTG-1901: “The Brain in Action” and SFB-TRR-135:  
422 “Cardinal Mechanisms of Perception”), and an ERC Consolidator Award (ERC-2015-CoG-682859:  
423 “SHAPE”). Guido Maiello was supported by a Marie-Skłodowska-Curie Actions Individual  
424 Fellowship (H2020-MSCA-IF-2017: “VisualGrasping” Project ID: 793660).

425

426 **DATA AVAILABILITY.** Data and analysis scripts will be made available from the Zenodo database  
427 (doi: 10.5281/zenodo.xxxxxxx upon publication).

428

429

430 **REFERENCES**

- 431 Borra E, Belmalih A, Calzavara R, Gerbella M, Murata A, Rozzi S, Luppino G (2008). Cortical  
432 connections of the macaque anterior intraparietal (AIP) area. *Cereb Cortex*, 18(5), 1094-  
433 1111.
- 434 Briere J, Proteau L (2011) Automatic movement error detection and correction processes in  
435 reaching movements. *Exp Brain Res*, 208(1): 39-50.
- 436 Burstedt MKO, Flanagan JL, Johansson RS (1999) Control of grasp stability in humans under  
437 different frictional conditions during multidigit manipulation. *J Neurophysiol*, 82(5): 2392-  
438 2405
- 439 Derzsi Z, Volcic R, (2018) MOTOM toolbox: MOTion Tracking via Optotrak and Matlab. *J Neurosci*  
440 *Methods*, 308: 129–134.
- 441 Fikes TG, Klatzky RL, Lederman SJ (1994) Effects of object texture on precontact movement time  
442 in human prehension. *J Mot Behav*, 26(4): 325-332
- 443 Glowania C, van Dam LCL, Brenner E, Plaisier MA (2017) Smooth at one end and rough at the  
444 other: influence of object texture on grasping behavior. *Exp Brain Res*, 235(9): 2821-2827
- 445 Grea H, Desmurget M, Prablanc C (2000) Postural invariance in three-dimensional reaching and  
446 grasping movements. *Exp Brain Res*, 134(2): 155-162
- 447 Hesse C, Franz VH (2009) Corrective processes in grasping after perturbations of object size. *J*  
448 *Mot Behav*, 41(3): 253-273
- 449 Jaeger, TF (2008). Categorical data analysis: Away from ANOVAs (transformation or not) and  
450 towards logit mixed models. *J Mem Lang*, 59(4), 434-446.
- 451 Klein LK, Maiello G, Paulun VC, Fleming RW (2020) Predicting precision grip grasp locations on  
452 three-dimensional objects. *PLoS Comput Biol*, 16(8), e1008081.
- 453 Kleinholdermann U, Brenner E, Franz VH, Smeets JBJ (2007) Grasping trapezoidal objects. *Exp*  
454 *Brain Res*, 180(3): 415-420
- 455 Lederman SJ, Wing AM (2003). Perceptual judgement, grasp point selection and object  
456 symmetry. *Exp Brain Res*, 152(2): 156-165
- 457 Lukos JR, Choi JY, Santello M (2013) Grasping uncertainty: effects of sensorimotor memories on  
458 high-level planning of dexterous manipulation. *J Neurophysiol*, 109(12): 2937-2946
- 459 Lukos J, Ansuini C, Santello M (2007) Choice of contact points during multidigit grasping: effect  
460 of predictability of object centre of mass location. *J Neurosci*, 27(14): 3894-3903
- 461 Maiello G, Paulun VC, Klein LK, Fleming RW (2019) Object visibility, not energy expenditure,  
462 accounts for spatial biases in human grasp selection. *i-perception*, 10(1):  
463 20141669519827608
- 464 Maiello G, Paulun VC, Klein LK, Fleming RW (2018) The sequential-weight illusion. *i-perception*,  
465 9(4): 2041669518790275

- 466 Maiello G, Schepko M, Klein LK, Paulun VC and Fleming RW (2021) Humans Can Visually Judge  
467 Grasp Quality and Refine Their Judgments Through Visual and Haptic Feedback. *Front*  
468 *Neurosci* 14:591898.
- 469 Murata A, Gallese V, Luppino G, Kaseda M, Sakata H (2000). Selectivity for the shape, size, and  
470 orientation of objects for grasping in neurons of monkey parietal area AIP. *J Neurophysiol*,  
471 83(5), 2580-2601.
- 472 Paulignan Y, Frak VG, Toni I, Jeannerod M (1997) Influence of object position and size on human  
473 prehension movements. *Exp Brain Res*, 114(2): 226-234
- 474 Paulun VC, Gegenfurtner KR, Goodale MA, Fleming RW (2016) Effects of material properties and  
475 object orientation on precision grip kinematics. *Exp Brain Res*, 234(8): 2253-2265
- 476 Raos V, Umiltá MA, Gallese V, Fogassi L (2004). Functional properties of grasping-related neurons  
477 in the dorsal premotor area F2 of the macaque monkey. *J Neurophysiol*, 92(4), 1990-2002
- 478 Raos V, Umiltá MA, Murata A, Fogassi L, Gallese V (2006). Functional properties of grasping-  
479 related neurons in the ventral premotor area F5 of the macaque monkey. *J Neurophysiol*,  
480 95(2), 709-729
- 481 Rosenbaum DA, Vaughan HJ, Meulenbroek RJ, Jansen C (2001) Posture-based motion planning:  
482 Applications to grasping. *Psychol Rev*, 108(4): 709-734
- 483 Rosenbaum DA, Vaughan J, Barnes HJ, Jorgensen MJ (1992) Time course of movement planning:  
484 selection of handgrips for object manipulation. *J Exp Psychol Learn Mem Cogn*, 18(5):  
485 1058-1073
- 486 Rossetti Y, Meckler C, Prablanc C (1994) Is there an optimal arm posture? Deterioration of finger  
487 localization precision and comfort sensation in extreme arm-joint postures. *Exp Brain Res*,  
488 99(1): 131-136
- 489 Schot WD, Brenner E, Smeets JBJ (2010) Posture of the arm when grasping spheres to place them  
490 elsewhere. *Exp Brain Res*, 204(2): 163–171
- 491 Schot WD, Brenner E, Smeets JBJ (2010) Robust movement segmentation by combining multiple  
492 sources of information. *J Neurosci Methods*, 187(2): 147-155
- 493 Smeets JBJ, Brenner E (1999) A new view on grasping. *Motor Control*, 3(3):237-271
- 494 Soechting JF, Buneo CA, Herrmann U, Flanders M (1995) Moving effortlessly in three dimensions:  
495 does Donders' law apply to arm movement? *J Neurosci* 15(9): 6271-6280
- 496 van de Kamp C, Bongers RM, Zaal FTJM (2009) Effects of changing object size during prehension.  
497 *J Mot Behav*, 41(5): 427-435
- 498 Voudouris D, Broda MD, Fiehler K (2019) Anticipatory grasping control modulates somatosensory  
499 perception. *J Vis*, 19(5): 4
- 500 Voudouris D, Radhakrishnan S, Hatzitaki V, Brenner E (2013) Does postural stability affect  
501 grasping? *Gait Posture*, 38(3): 477-482
- 502 Voudouris D, Smeets JBJ, Brenner (2013) Ultra-fast selection of grasping points. *J Neurophysiol*,  
503 110(7): 1484-1489

- 504 Voudouris D, Smeets JBJ, Brenner E (2012a) Do obstacles affect the selection of grasping points?  
505 *Hum Mov Sci*, 31(5): 1090-1102
- 506 Voudouris D, Smeets JBJ, Brenner E (2012b) Do humans prefer to see their grasping points? *J Mot*  
507 *Behav*, 44(4): 295-304
- 508 Voudouris D, Brenner E, Schot WD, Smeets JBJ (2010) Does planning a different trajectory  
509 influence the choice of grasping points? *Exp Brain Res*, 206(1): 15-24
- 510 Wilson DJ (2019) The harmonic mean p-value for combining dependent tests. *Proc Natl Acad Sci*  
511 *USA*, 116(4): 1195-1200
- 512 Wing AM, Lederman SJ (2009) Points for precision grip. In: Nowak DA, Hermsdoerfer J (eds)  
513 Sensorimotor control for grasping: physiology and pathophysiology. Cambridge University  
514 Press, Cambridge, pp 193-203
- 515 Witney AG, Vetter P, Wolpert DM (2001) The influence of previous experience on predictive  
516 motor control. *Neuroreport*, 12(4): 649-653
